# Supplementary material
Source: Springer Nature journal article supplement (https://www.springermedizin.de/resource/supplementary/13685_2013_33_MOESM3_ESM.pdf/9681248)

PROTONMOTIVE FORCE

ATP  
PRODUCTION

PROTON LEAK

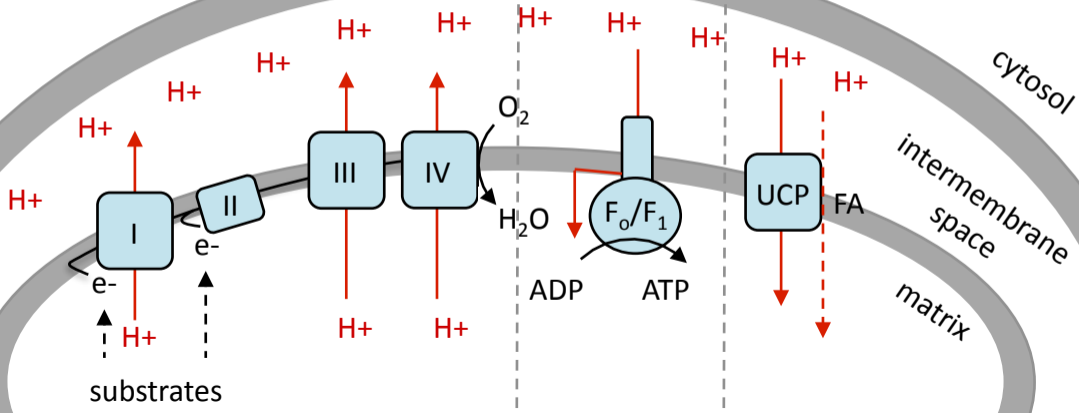

Supplement: MOESM3 [file 9681248]
